# Supplementary material for: Establishing a Pediatric Acute-Onset Neuropsychiatric Syndrome Clinic: Baseline Clinical Features of the Pediatric Acute-Onset Neuropsychiatric Syndrome Cohort at Karolinska Institutet
Source: PubMed Central journal article supplement (PMC6786340; doi:10.1089/cap.2018.0127), 2019-10-07
Supplement: Supp_Table1.pdf [file Supp_Table1.pdf]

## Supplementary Data

SUPPLEMENTARY TABLE S1. COMPARISON OF PATIENT CHARACTERISTICS DIFFERENTIATING AUTOIMMUNE DISEASE AND NONAUTOIMMUNE DISEASE GROUPS AT INTAKE (N=45)

| <i>Patient demographics</i>                                                                | <i>Total cohort (n=45)</i> | <i>AD (n=26)</i>    | <i>Non-AD (n=19)</i> | <i>Chi-square/<br/>t-test (df)</i> | <i>p-Value</i> |
|--------------------------------------------------------------------------------------------|----------------------------|---------------------|----------------------|------------------------------------|----------------|
| Male                                                                                       | 25/45 (56%)                | 15/26 (58%)         | 10/19 (53%)          | 0.11                               | 0.736          |
| Mean age at symptom onset (years)                                                          | 7.5 (SD 2.5)               | 7.4 (SD 2.7)        | 7.6 (SD 2.2)         | 0.37 (42.5)                        | 0.710          |
| Mean age at intake (years)                                                                 | 9.0 (SD 3.1)               | 9.1 (SD 3.5)        | 8.9 (SD 2.7)         | -0.21 (42.7)                       | 0.833          |
| Developmental abnormalities (psychomotor, language disorder, and/or learning disability)   | 8/45 (18%)                 | 2/26 (8%)           | 6/19 (32%)           | 0.04                               | 0.053          |
| Preexisting psychiatric/neuropsychiatric diagnoses                                         | 8/45 (18%)                 | 4/26 (15%)          | 4/19 (21%)           | 0.24                               | 0.624          |
| Preexisting autoimmune disease or inflammatory disorder                                    | 11/45 (24%)                | 11/26 (42%)         | 0                    | —                                  | —              |
| CGAS at intake <sup>a</sup>                                                                | 50 (SD 10.1) (n=43)        | 50 (SD 11.6) (n=24) | 49 (SD 8.3) (n=19)   | -0.32 (40.7)                       | 0.752          |
| CGI-S at intake                                                                            | 3.8 (SD 0.9)               | 3.8 (SD 1.0)        | 3.8 (SD 0.9)         | -0.20 (42.0)                       | 0.840          |
| Acute onset                                                                                | 42/45 (93%)                | 25/26 (96%)         | 17/19 (89%)          | 0.78                               | 0.394          |
| Infection in temporal relation to symptom onset                                            | 42/45 (93%)                | 25/26 (96%)         | 17/19 (89%)          | 0.78                               | 0.394          |
| Onset of autoimmune disease or inflammatory disorder in temporal relation to symptom onset | 7/45 (16%)                 | 7/26 (27%)          | 0                    | —                                  | —              |

<sup>a</sup>Available for 43 patients only.

AD, autoimmune disease; AD group, diagnosis of AD in the patient or first-degree relative; CGAS, Children's Global Assessment Scale; CGI-S, Clinical Global Impressions-Severity Scale; non-AD group, neither the patient nor first-degree relative has a diagnosis of AD; SD, standard deviation.
