# Supplementary material for: Establishing a Pediatric Acute-Onset Neuropsychiatric Syndrome Clinic: Baseline Clinical Features of the Pediatric Acute-Onset Neuropsychiatric Syndrome Cohort at Karolinska Institutet
Source: PubMed Central journal article supplement (PMC6786340; doi:10.1089/cap.2018.0127), 2019-10-07
Supplement: Supp_Table2.pdf [file Supp_Table2.pdf]

SUPPLEMENTARY TABLE S2. ONSET SYMPTOMS AS DESCRIBED IN PATIENT RECORDS AND/OR AT PRESENTATION AT THE CLINIC, DIFFERENTIATING AUTOIMMUNE DISEASE AND NONAUTOIMMUNE DISEASE GROUPS

| <i>Symptom onset/presentation</i>                                    | <i>Total cohort (n=45)</i> | <i>AD (n=26)</i>   | <i>Non-AD (n=19)</i> | <i>Chi-square</i> | <i>Significance (p-value)</i> |
|----------------------------------------------------------------------|----------------------------|--------------------|----------------------|-------------------|-------------------------------|
| Obsessive-compulsive disorder                                        | 40/45 (89%)                | 24/26 (92%)        | 16/19 (84%)          | 0.72              | 0.402                         |
| Eating disorder (anorexia/avoidant restrictive food intake disorder) | 18/45 (40%)                | 10/26 (38%)        | 8/19 (42%)           | 0.06              | 0.805                         |
| Anxiety (including separation anxiety)                               | 35/45 (78%)                | 20/26 (77%)        | 15/19 (79%)          | 0.75              | 0.872                         |
| Emotional lability/depression                                        | 32/45 (71%)                | 18/26 (69%)        | 14/19 (74%)          | 0.11              | 0.745                         |
| Irritability/aggression                                              | 20/45 (44%)                | 13/26 (50%)        | 7/19 (37%)           | 0.77              | 0.382                         |
| Regression                                                           | 18/45 (40%)                | 9/26 (35%)         | 9/19 (47%)           | 0.74              | 0.390                         |
| Tics                                                                 | 26/42 (62%) (n=42)         | 12/25 (48%) (n=25) | 14/17 (82%) (n=17)   | 5.36              | 0.031                         |
| Motor abnormalities                                                  | 27/45 (60%)                | 15/26 (58%)        | 12/19 (63%)          | 0.14              | 0.712                         |
| Sensor abnormalities                                                 | 18/36 (50%) (n=36)         | 11/21 (52%) (n=21) | 7/15 (47%) (n=15)    | 0.11              | 0.735                         |
| Sleeping disorder                                                    | 31/45 (69%)                | 20/26 (77%)        | 11/19 (58%)          | 1.84              | 0.178                         |
| Hyperactivity                                                        | 18/42 (43%) (n=42)         | 9/24 (38%) (n=24)  | 9/18 (50%) (n=18)    | 0.66              | 0.419                         |
| Attention deficit                                                    | 22/35 (63%) (n=35)         | 10/19 (53%) (n=19) | 12/16 (75%) (n=16)   | 1.90              | 0.178                         |
| Deterioration in school performance                                  | 17/34 (50%) (n=34)         | 11/19 (58%) (n=19) | 6/15 (40%) (n=15)    | 1.08              | 0.303                         |
| Urinary problems (enuresis)                                          | 18/41 (44%) (n=41)         | 9/24 (38%) (n=24)  | 9/17 (53%) (n=17)    | 0.96              | 0.329                         |
| Pain                                                                 | 14/37 (38%) (n=37)         | 8/22 (36%) (n=22)  | 6/15 (40%) (n=15)    | 0.05              | 0.823                         |

AD, autoimmune disease; AD group, diagnosis of AD in the patient or first-degree relative; non-AD group, neither the patient nor first-degree relative has a diagnosis of AD.
