# Supplementary material for: Establishing a Pediatric Acute-Onset Neuropsychiatric Syndrome Clinic: Baseline Clinical Features of the Pediatric Acute-Onset Neuropsychiatric Syndrome Cohort at Karolinska Institutet
Source: PubMed Central journal article supplement (PMC6786340; doi:10.1089/cap.2018.0127), 2019-10-07
Supplement: Supp_Table3.pdf [file Supp_Table3.pdf]

SUPPLEMENTARY TABLE S3. SOMATIC FINDINGS AT FIRST CLINICAL EVALUATION AT THE CLINIC, DIFFERENTIATING AUTOIMMUNE DISEASE AND NONAUTOIMMUNE DISEASE GROUPS

| <i>Somatic sign onset/presentation</i>                                                | <i>Total cohort (n=45)</i> | <i>AD (n=26)</i>  | <i>Non-AD (n=19)</i> | <i>Chi-square</i> | <i>Significance (p-value)</i> |
|---------------------------------------------------------------------------------------|----------------------------|-------------------|----------------------|-------------------|-------------------------------|
| Abnormalities in somatic assessment of:                                               |                            |                   |                      |                   |                               |
| Heart                                                                                 | 1/28 (4%) (n=28)           | 0/17 (0%) (n=17)  | 1/11 (9%) (n=10)     | —                 | —                             |
| Lungs                                                                                 | 0/27 (0%) (n=27)           | 0/18 (0%) (n=18)  | 0/9 (0%) (n=9)       | —                 | —                             |
| Stomach                                                                               | 0/13 (0%) (n=13)           | 0/7 (0%) (n=7)    | 0/6 (0%) (n=6)       | —                 | —                             |
| Joints                                                                                | 0/16 (0%) (n=16)           | 0/11 (0%) (n=11)  | 0/5 (0%) (n=5)       | —                 | —                             |
| Ear, nose, and throat infection signs                                                 | 12/26 (46%) (n=26)         | 8/17 (47%) (n=17) | 4/9 (44%) (n=9)      | 0.02              | 0.899                         |
| Palatal petechiae                                                                     | 2/22 (10%) (n=22)          | 1/14 (7%) (n=14)  | 1/8 (13%) (n=8)      | 0.17              | 0.678                         |
| Skin abnormalities (dermatographia, livedo, severe dryness, redness, rash, or eczema) | 11/18 (61%) (n=18)         | 6/11 (55%) (n=11) | 5/7 (71%) (n=7)      | 0.52              | 0.477                         |
| Neurological abnormalities                                                            | 7/31 (23%) (n=31)          | 3/20 (15%) (n=20) | 4/11 (36%) (n=11)    | 1.79              | 0.185                         |
| Abnormalities in motor function                                                       | 7/31 (23%) (n=31)          | 4/19 (21%) (n=19) | 3/11 (27%) (n=11)    | 0.15              | 0.699                         |
| Chorea                                                                                | 1/41 (2%) (n=41)           | 1/24 (4%) (n=24)  | 0/17 (0%) (n=17)     | —                 | —                             |
| Choreiform movements                                                                  | 6/26 (23%) (n=26)          | 3/17 (18%) (n=17) | 3/9 (33%) (n=9)      | 0.79              | 0.373                         |

AD, autoimmune disease; AD group, diagnosis of AD in the patient or first-degree relative; non-AD group, neither the patient nor first-degree relative has a diagnosis of AD.
