# Supplementary material for: Establishing a Pediatric Acute-Onset Neuropsychiatric Syndrome Clinic: Baseline Clinical Features of the Pediatric Acute-Onset Neuropsychiatric Syndrome Cohort at Karolinska Institutet
Source: PubMed Central journal article supplement (PMC6786340; doi:10.1089/cap.2018.0127), 2019-10-07
Supplement: Supp_Table4.pdf [file Supp_Table4.pdf]

SUPPLEMENTARY TABLE S4. LABORATORY FINDINGS DIFFERENTIATING AUTOIMMUNE DISEASE AND NONAUTOIMMUNE DISEASE GROUPS

| <i>Laboratory findings</i>    | <i>Total cohort (n=45)</i> | <i>AD (n=26)</i>  | <i>Non-AD (n=19)</i> | <i>Chi-square</i> | <i>Significance (p-value)</i> |
|-------------------------------|----------------------------|-------------------|----------------------|-------------------|-------------------------------|
| CBC abnormalities             | 26/45 (58%)                | 15/26 (58%)       | 11/19 (58%)          | 0                 | 0.989                         |
| Elevated ESR                  | 6/43 (14%) (n=43)          | 3/26 (12%)        | 3/17 (18%) (n=17)    | 0.31              | 0.574                         |
| Elevated CRP                  | 4/37 (11%) (n=37)          | 1/21 (5%) (n=21)  | 3/16 (19%) (n=19)    | 1.86              | 0.206                         |
| Low ferritin                  | 8/39 (21%) (n=39)          | 4/24 (17%) (n=24) | 4/15 (27%) (n=15)    | 0.56              | 0.455                         |
| Low vitamin D                 | 10/36 (28%) (n=36)         | 6/21 (29%) (n=21) | 4/15 (27%) (n=15)    | 0.02              | 0.900                         |
| TSH abnormalities             | 4/40 (10%) (n=40)          | 3/25 (12%) (n=25) | 1/15 (7%) (n=15)     | 0.31              | 0.591                         |
| Low T4                        | 0/40 (0%) (n=40)           | 0/25 (0%) (n=25)  | 0/15 (0%) (n=15)     | —                 | —                             |
| Anti-TPO                      | 4/38 (11%) (n=38)          | 3/25 (12%) (n=25) | 1/13 (8%) (n=13)     | 0.18              | 0.684                         |
| Transglutaminase antibodies   | 2/40 (5%) (n=40)           | 2/25 (8%) (n=25)  | 0/15 (0%) (n=15)     | —                 | —                             |
| ANA                           | 7/41 (17%) (n=41)          | 5/25 (20%) (n=25) | 2/16 (13%) (n=16)    | 0.40              | 0.537                         |
| Histone antibodies            | 0/31 (0%) (n=31)           | 0/21 (0%) (n=21)  | 0/10 (0%) (n=10)     | —                 | —                             |
| Elevated SAA                  | 3/22 (14%) (n=22)          | 1/14 (7%) (n=14)  | 2/8 (25%) (n=8)      | 1.32              | 0.267                         |
| Complement activation         | 13/35 (37%) (n=35)         | 7/22 (32%) (n=22) | 6/13 (46%) (n=13)    | 0.71              | 0.399                         |
| Low IgG                       | 4/36 (11%) (n=36)          | 2/22 (9%) (n=22)  | 2/14 (14%) (n=14)    | 0.23              | 0.631                         |
| Low IgA                       | 3/34 (9%) (n=34)           | 3/22 (14%) (n=22) | 0/12 (0%) (n=12)     | —                 | —                             |
| Low IgM                       | 0/34 (0%) (n=34)           | 0/22 (0%) (n=22)  | 0/12 (0%) (n=12)     | —                 | —                             |
| Elevated IL-1- $\beta$        | 0/25 (0%) (n=25)           | 0/14 (0%) (n=14)  | 0/9 (0%) (n=9)       | —                 | —                             |
| Elevated IL-6                 | 1/25 (4%) (n=25)           | 0/15 (0%) (n=15)  | 1/11 (9%) (n=11)     | —                 | —                             |
| Elevated IL-8                 | 0/25 (0%) (n=25)           | 0/14 (0%) (n=14)  | 0/11 (0%) (n=11)     | —                 | —                             |
| Elevated TNF- $\alpha$        | 0/24 (0%) (n=24)           | 0/14 (0%) (n=14)  | 0/10 (0%) (n=10)     | —                 | —                             |
| Positive strep/throat culture | 5/10 (50%) (n=10)          | 4/8 (50%) (n=8)   | 1/2 (50%) (n=2)      | 0                 | 1.000                         |

AD, autoimmune disease; AD group, diagnosis of AD in the patient or first-degree relative; ANA, antinuclear antibodies; CBC, complete blood count; CRP, C-reactive protein; ESR, erythrocyte sedimentation rate; IgA, immunoglobulin A; IgM, immunoglobulin M; IL, interleukin; non-AD group, neither the patient nor first-degree relative has a diagnosis of AD; SAA, serum amyloid A; TNF- $\alpha$ , tumor necrosis factor- $\alpha$ ; TPO, thyroperoxidase; TSH, thyroid-stimulating hormone.
