# Supplementary material for: Establishing a Pediatric Acute-Onset Neuropsychiatric Syndrome Clinic: Baseline Clinical Features of the Pediatric Acute-Onset Neuropsychiatric Syndrome Cohort at Karolinska Institutet
Source: PubMed Central journal article supplement (PMC6786340; doi:10.1089/cap.2018.0127), 2019-10-07
Supplement: Supp_Table5.pdf [file Supp_Table5.pdf]

SUPPLEMENTARY TABLE S5. PSYCHIATRIC DISORDERS IN FIRST-, SECOND-, AND THIRD-DEGREE RELATIVES, DIFFERENTIATING AUTOIMMUNE DISEASE AND NONAUTOIMMUNE DISEASE GROUPS

| <i>Family history</i>                                                                | <i>Total cohort (n=45)</i> | <i>AD (n=26)</i> | <i>Non-AD (n=19)</i> | <i>Chi-square</i> | <i>Significance (p-value)</i> |
|--------------------------------------------------------------------------------------|----------------------------|------------------|----------------------|-------------------|-------------------------------|
| Psychiatric/neuropsychiatric disorder in first-, second-, and third-degree relatives |                            |                  |                      |                   |                               |
| Attention-deficit/hyperactivity disorder                                             | 9/45 (20%)                 | 4/26 (15%)       | 5/19 (26%)           | 0.81              | 0.370                         |
| Autism spectrum disorder                                                             | 5/45 (11%)                 | 3/26 (12%)       | 2/19 (11%)           | 0.01              | 0.915                         |
| Tics                                                                                 | 6/45 (13%)                 | 5/26 (19%)       | 1/19 (5%)            | 2.05              | 0.202                         |
| Obsessive-compulsive disorder                                                        | 7/45 (16%)                 | 4/26 (15%)       | 3/19 (16%)           | 0                 | 0.970                         |
| Anxiety disorder                                                                     | 7/45 (16%)                 | 3/26 (12%)       | 4/19 (21%)           | 0.75              | 0.390                         |
| Depression                                                                           | 16/45 (36%)                | 7/26 (27%)       | 9/19 (47%)           | 2.00              | 0.161                         |
| Any                                                                                  | 29/45 (64%)                | 16/26 (62%)      | 13/19 (68%)          | 0.23              | 0.634                         |

AD, autoimmune disease; AD group, diagnosis of AD in the patient or first-degree relative; non-AD group, neither the patient nor first-degree relative has a diagnosis of AD.
